# Supplementary material
Source: Springer Nature journal article supplement (https://www.springermedizin.de/resource/supplementary/12981_2009_104_MOESM1_ESM.pdf/9603890)

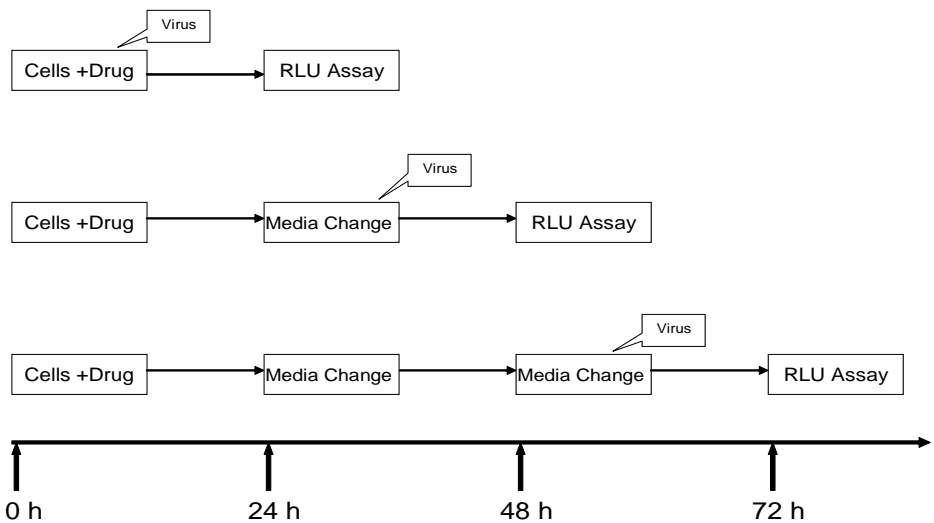

Supplement: MOESM1 [file 9603890]
